# Supplementary material for: Muscle 4EBP1 activation modifies the structure and function of the neuromuscular junction in mice
Source: Springer Nature journal article supplement (doi:10.1038/s41467-022-35547-0), 2022-12-17
Supplement: MOESM1 [file 41467_2022_35547_MOESM1_ESM.pdf]

## **Supplemental information**

**Title:** Muscle 4EBP1 activation modifies the structure and function of the neuromuscular junction in mice

### **Authors and affiliations:**

Seok-Ting J. Ang<sup>1,2</sup>, Elisa M. Crombie<sup>1</sup>, Han Dong<sup>1</sup>, Kuan-Ting Tan<sup>1</sup>, Adriel Hernando<sup>1</sup>, Dejie Yu<sup>2,3,4</sup>, Stuart Adamson<sup>5</sup>, Seonyoung Kim<sup>1</sup>, Dominic J. Withers<sup>6,7</sup>, Hua Huang<sup>2,3,4</sup> and Shih-Yin Tsai<sup>1,2</sup>

<sup>1</sup>Department of Physiology, Yong Loo Lin School of Medicine, National University of Singapore, Singapore, 117593, Singapore.

<sup>2</sup>Healthy Longevity Translational Research Programme, Yong Loo Lin School of Medicine, National University of Singapore, Singapore, 117456, Singapore

<sup>3</sup>Electrophysiology Core Facility, Yong Loo Lin School of Medicine, National University of Singapore, Singapore 117544, Singapore

<sup>4</sup>Cardiovascular Diseases Program, National University of Singapore, Singapore 117599, Singapore

<sup>5</sup>Buck Institute for Research on Aging, Novato, California, USA

<sup>6</sup>Metabolic Signalling Group, Medical Research Council Clinical Council London Institute of Medical Sciences (LMS), Du Cane Road, London W12 0NN, United Kingdom.

<sup>7</sup>Institute of Clinical Sciences (ICS), Faculty of Medicine, Imperial College London, Du Cane Road, London W12 0NN, United Kingdom.

### **This PDF file includes:**

Supplementary Figure 1-7

Supplementary Table 1-7

## Supplementary Figures

### Supplementary Fig. 1: Molecular and histological analysis of the NMJ.

- a.** Quantification of the percentage of denervated NMJs in 6- and 28-month-old control male mice (using values from [Fig. 1d](#)). A denervated NMJ is defined as Mander's colocalization coefficient lower than 0.4. Sample size: 6mo Control, n=8 and 28mo Control, n=10; on average, 25 NMJs were analyzed per mouse. Statistical significance was determined by two-tailed unpaired student t-test.
- b.** qPCR of select AChR subunit and denervation-related genes in whole muscle lysate from 6- and 28- month-old control mice. Sample size: 6mo Control Female, n=3-5; 28mo Control Female, n=5-6; 6mo Control Male, n=3-4; 28mo Control Male, n=6-7. Statistical significance was determined by one-way ANOVA followed by Tukey's post-hoc pairwise comparison. Only a P value of less than 0.05 would be labeled in the figure.
- c.** Immunoblotting in quadriceps muscle of 12-month-old control and TSC1mKO mice. Ponceau red staining accompanying the immuoblots showing equal protein loading. Each lane represents individual mouse sample. Sample size: Control Male, n=4; TSC1mKO Male, n=4; Control Female, n=3; TSC1mKO Female, n=3.
- d.** Percentage distribution of AChR fragments of 12-month-old control (abbreviated as **C**), 12-month-old TSC1mKO (abbreviated as **T**), and 28-month-old control (abbreviated as **28C**) mice (analysis from [Fig. 3c](#)). Sample size: 12mo Control Female, n=3; 12mo TSC1mKO Female, n=4; 28mo Control Female, n=7; 12mo Control Male, n=4; 12mo TSC1mKO Male, n=3; 28mo Control Male, n=10; on average, 25 NMJs were analyzed per mouse. Statistical significance was determined by two-way ANOVA followed by Tukey multiple comparisons test. Only a P value of less than 0.05 would be labeled in the figure.
- e.** qPCR of select AChR subunit and denervation-related genes in whole muscle lysate from 12-month-old control and TSC1mKO mice. Sample size: 12mo Control Female, n=4-5; 12mo TSC1mKO Female, n=5-6; 12mo Control, n=5-7; TSC1mKO Male, n=5. Statistical significance was

determined by one-way ANOVA followed by Tukey's post-hoc pairwise comparison. Only a P value of less than 0.05 would be labeled in the figure.

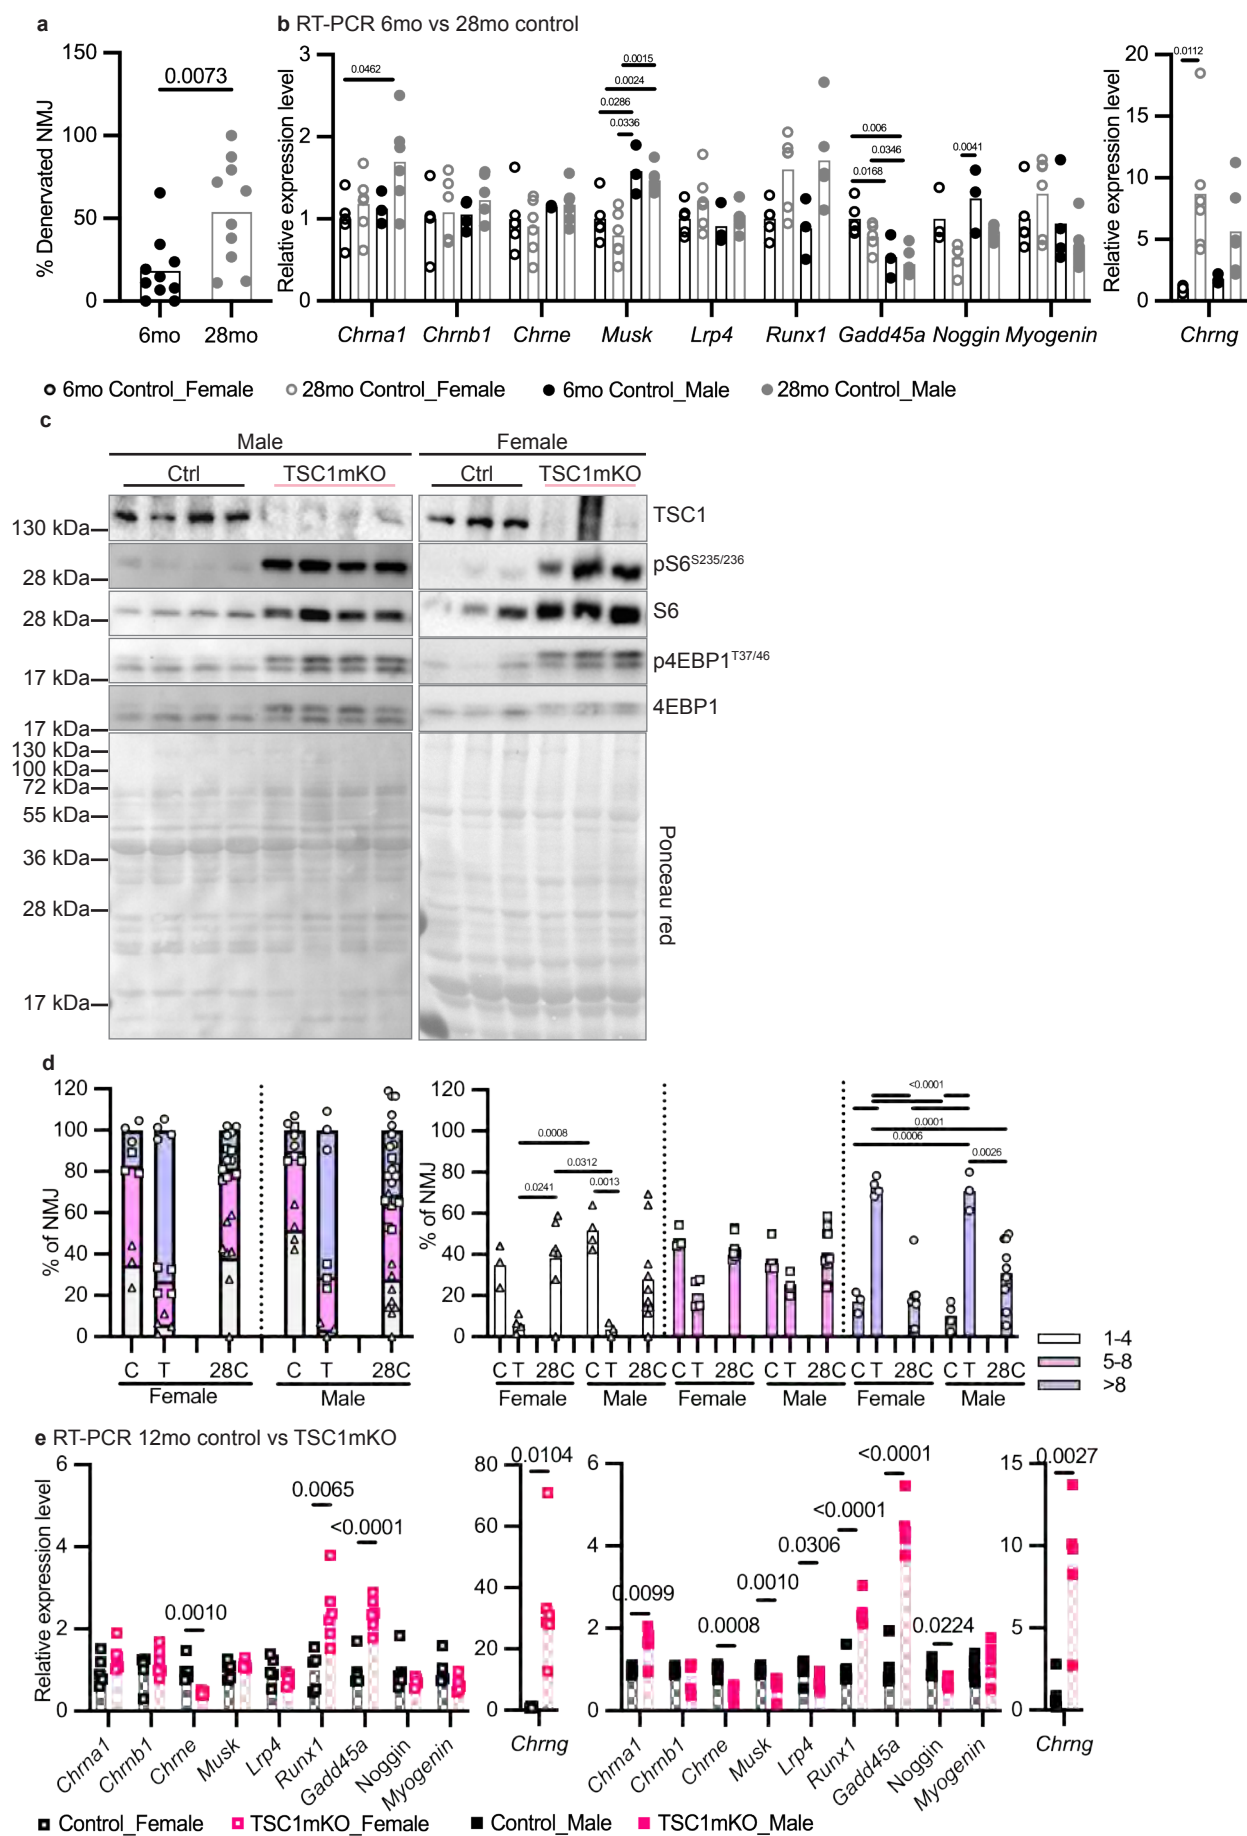

Figure S1



**Supplementary Fig. 2: Myofiber analysis of S6K1mKO mice.**

**a-b.** Representative H&E staining of (a) soleus and (b) tibialis anterior muscle from 6-month-old male mice (Control, n=4; S6K1mKO, n=3). Scale bars are indicated in the image.

**c-d.** Immunofluorescent staining for MyHC and WGA (white) (c) soleus (scale bar = 100 $\mu$ m) and (d) tibialis anterior (scale bar = 200 $\mu$ m) muscle from 6-month-old male mice (Control, n=4; S6K1mKO, n=3).

**e-f.** Quantification of cross-section size from selective MyHC in (e) soleus and (f) tibialis anterior muscle from male mice. Sample size: 6mo Control, n=3-4; 6mo S6K1mKO, n=3; 28mo Control, n=5; 28mo S6K1mKO, n=3-4; on average, ~6000-11000 myofibers were analyzed per mouse. Statistical significance: Data are shown as mean  $\pm$  SEM and statistical significance was determined by two-way ANOVA with Tukey's multiple comparison test compared within the size class. \*P<0.05, \*\*P<0.01, \*\*\*P<0.001, \*\*\*\*P<0.0001 indicates statistical significance of young versus old in either Control (black) or S6K1mKO (light blue) mice. #P<0.05, ##P<0.01, ###P<0.001, indicates significance of Control versus S6K1mKO in young (gray) mice.

**g.** Measurement of muscle coordination and strength by four limbs hanging test in 4-month-old male and female mice. Sample size: Control Male, n=20; S6K1mKO Male, n=26; Control Female, n=16; S6K1mKO Female, n=20. Statistical significance was determined by one-way ANOVA with Tukey's multiple comparison test compared within the same sex group. Only P<0.05 will be indicated in the graph.

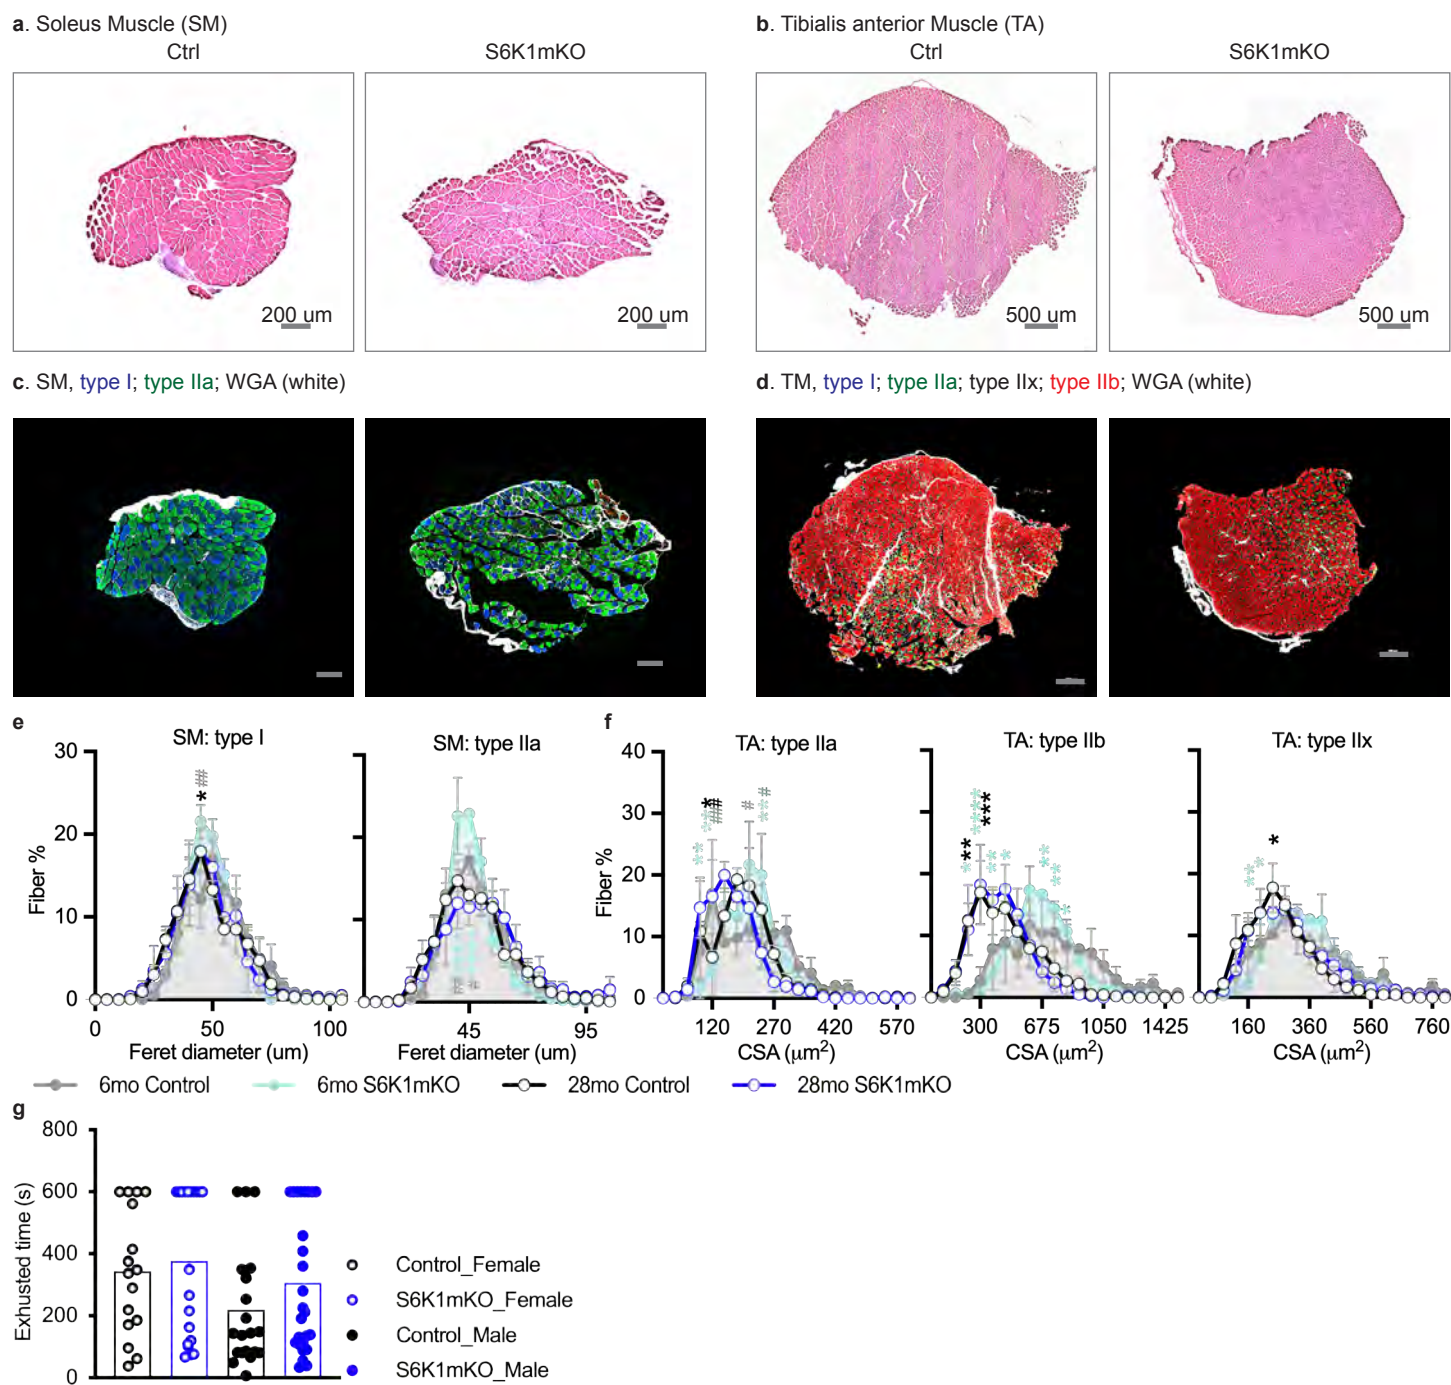

Figure S2

**Supplementary Fig. 3: Muscle-specific deletion of *S6k1* attenuates intracellular pS6 accumulation during aging.**

**a.** Representative confocal images of BTX (green), pS6<sup>S240+244</sup> (red), DAPI (blue) and Laminin (white) staining from cross-sections of the gastrocnemius muscle of 6-month-old control (n=3) and S6K1mKO (n=3) male mice. The BTX and pS6<sup>S240+244</sup> channels are shown in the bottom panels. Open arrow = junctional pS6<sup>S240+244</sup>; Arrowhead = pS6<sup>S240+244</sup> in the nucleus. Scale bar = 50μm.

**b.** Representative confocal images of BTX (green), pS6<sup>S240+244</sup> (red), DAPI (blue) and Laminin (white) staining from cross-sections of the gastrocnemius muscle of 12- and 28-month-old male mice (12mo S6K1-TSC1mKO, n=3; 28mo S6K1mKO, n=5). The insets are shown in the bottom panels. Asterisks = intracellular pS6<sup>S240+244</sup> in angular, odd-shaped fibers; Arrowhead = pS6<sup>S240+244</sup> in the nucleus, including central nucleus. Scale bars = 50μm.

**c.** Quantification of the percentage of pS6<sup>S240+244</sup>-positive myofibers (left panel, one-way ANOVA followed by Tukey's post-hoc pairwise comparison) and mean CSA of pS6<sup>S240+244</sup>-positive (pS6+) and pS6<sup>S240+244</sup>-negative (pS6-) fibers (right panel, two-way ANOVA followed by Tukey's post-hoc pairwise comparison) in the gastrocnemius muscle sampled from 6-, 12-, and 28-month-old male mice. Sample size: 6mo Control and S6K1mKO Male, n=3 per group; 28mo Control Male, n=6; 28mo S6K1mKO Male, n=5; 12mo Control, TSC1mKO, and S6K1-TSC1mKO Male, n=3 per group; on average, 800 myofibers were analyzed per mouse. Detailed statistical analysis of CSA between groups within pS6- and pS6+ fibers is listed in [Supplementary Table. 1](#).

**d.** Immunoblotting of S6 phosphorylation at Ser240+244 and total S6 as well as total S6K1 in gastrocnemius muscle of 4-month-old control, S6K1mKO, TSC1mKO, and S6K1-TSC1mKO male mice. Ponceau red staining accompanying the immunoblots showing equal protein loading. Each lane represents individual mouse sample. Sample size: Control, n=11; S6K1mKO, n=4; TSC1mKO, n=4; TSC1-S6K1mKO, n=3; S6K1cko, n=1.

**e.** Immunoblotting of S6K2 phosphorylation at Ser423 and total S6K2 in gastrocnemius muscle of 4-month-old control and S6K1mKO male mice. Ponceau red staining accompanying the immunoblots showing equal protein loading. Each lane represents individual mouse sample. Sample size: Control, n=4; S6K1mKO, n=4; S6K1cko, n=1.

a BTX/pS6<sup>S240+244</sup>/DAPI/Laminin (white)

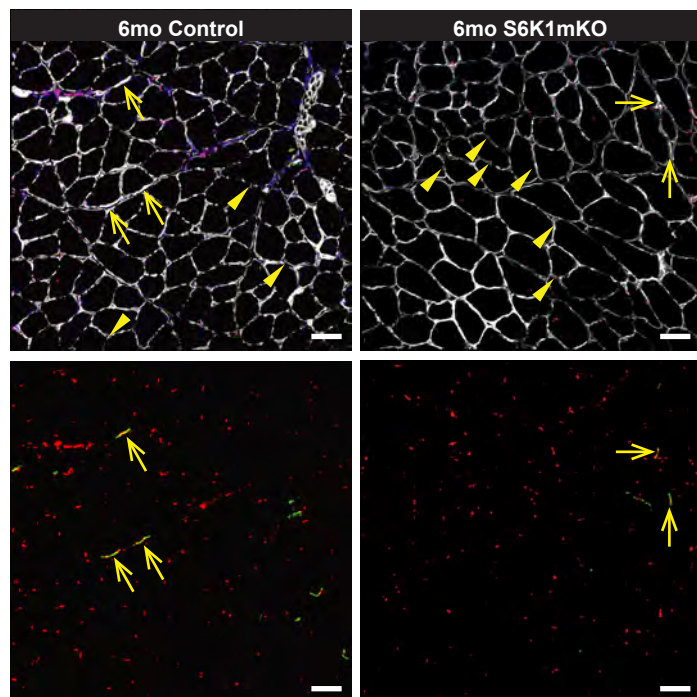

b BTX/pS6<sup>S240+244</sup>/DAPI/Laminin (white)

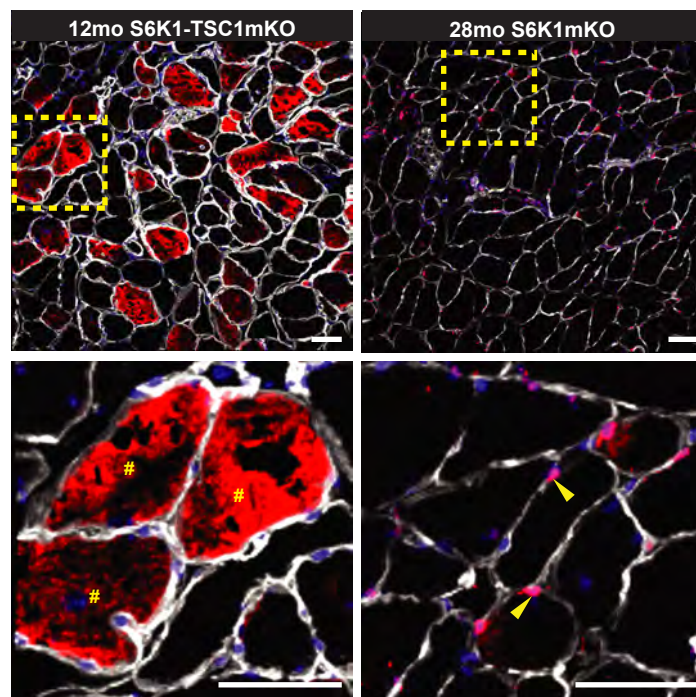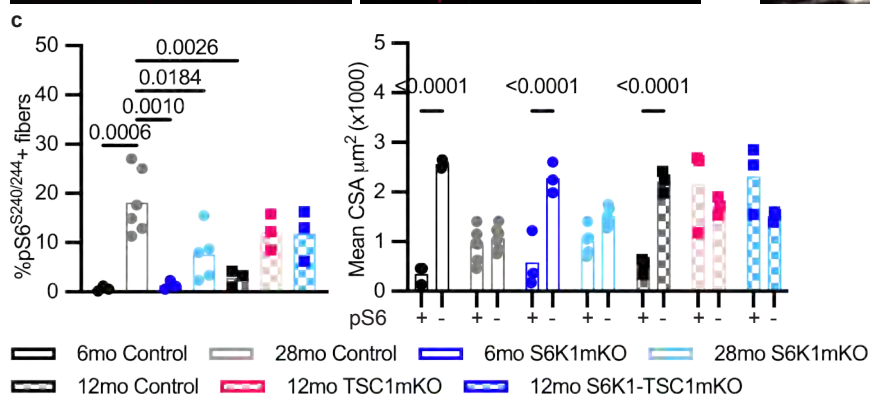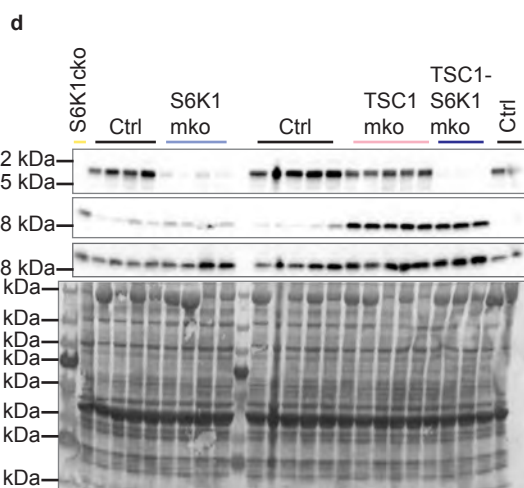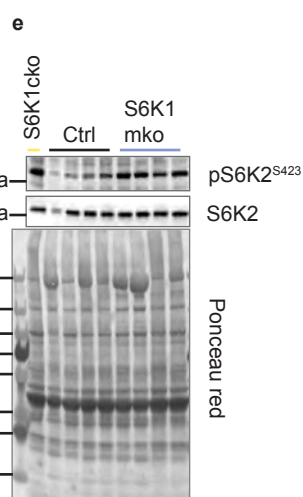

Figure S3

**Supplementary Fig. 4: Muscle-specific deletion of *S6k1* has no effect on NMJ remodeling.**

**a.** Representative confocal images of NMJs from longitudinal sections of the quadriceps muscle of male mice (28mo Control, n=10; 28mo S6K1mKO, n=4; 12mo Control, n=4; 12mo TSC1mKO and S6K1-TSC1mKO, n=3 per group). Top panels = BTX (green) and neurofilament (NF; red) + synaptophysin (Syn; red); Bottom panels = BTX (green) and DAPI (blue). Scale bar = 20µm.

**b-e.** Quantification of NMJ morphological properties which include **(b)** the number of AChR fragmentation, **(c)** the number of post-synaptic myonuclei, **(d)** Mander's colocalization coefficient, and **(e)** quantification of the percentages of NCAM-positive myofibers.

**f.** Representative confocal images of BTX (green), NCAM (red), DAPI (blue) and Laminin (white) staining from cross-sections of the gastrocnemius muscle of male mice (6mo Control, n=3; 28mo Control, n=6; 28mo S6K1mKO, n=5; 12mo Control, TSC1mKO, and S6K1-TSC1mKO Male, n=3 per group). Scale bars = 50µm.

Sample size: NMJ quantification ([Supplementary Fig. 4b-d](#)), 6mo and 28mo Control Female, n=7 per group; 6mo and 28mo S6K1mKO Female, n=3 per group; 12mo Control and S6K1-TSC1mKO Female, n=3 per group; 12mo TSC1mKO Female, n=4; 6mo and 28mo Control Male, n=10 per group; 6mo and 28mo S6K1mKO Male, n=4 per group; 12mo Control Male, n=4; 12mo TSC1mKO and S6K1-TSC1mKO Male, n=3 per group; on average, 25 NMJs were analyzed per animal.

Myofiber analysis of NCAM ([Supplementary Fig. 4e](#)), 6mo Control and S6K1mKO Male, n=3 per group; 28mo Control Male, n=6; 28mo S6K1mKO Male, n=5; 12mo Control, TSC1mKO, and S6K1-TSC1mKO Male, n=3 per group; on average, 800 myofibers were analyzed per mouse.

Statistical significance: NMJ quantification ([Supplementary Fig. 4b-d](#)), two-way ANOVA followed by Tukey's post-hoc pairwise comparison; Myofiber analysis of NCAM ([Supplementary Fig. 4e](#)), one-way ANOVA followed by Tukey's post-hoc pairwise comparison. Only P<0.05 will be indicated in the graph.



a BTX / NF + Syn / DAPI

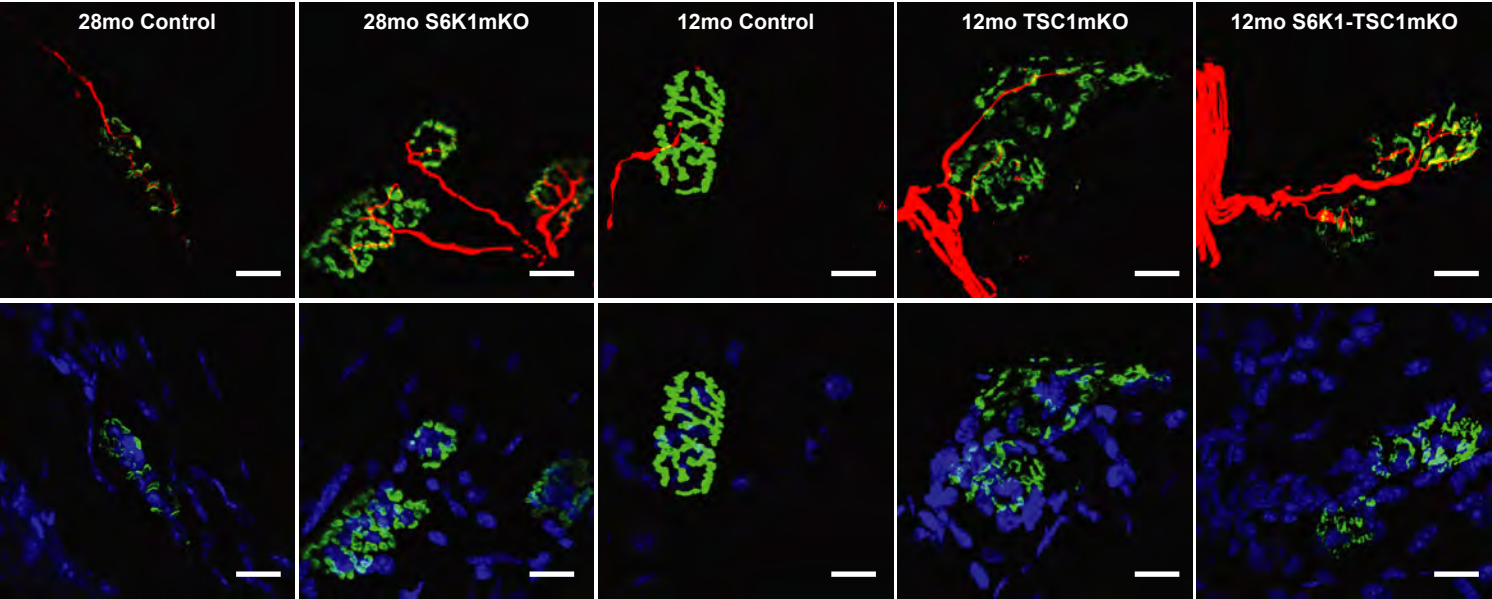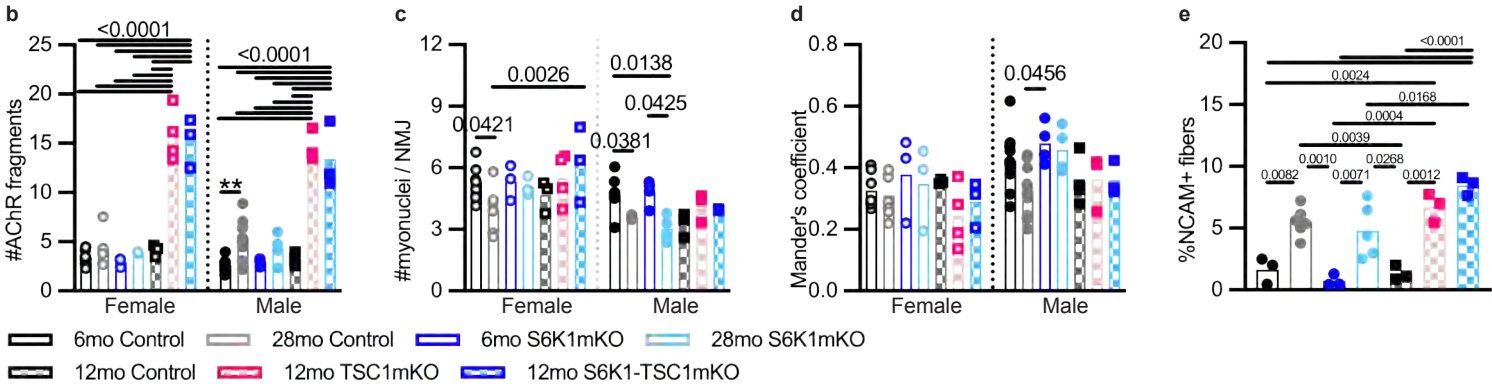

f BTX / NCAM / DAPI / Laminin (white)

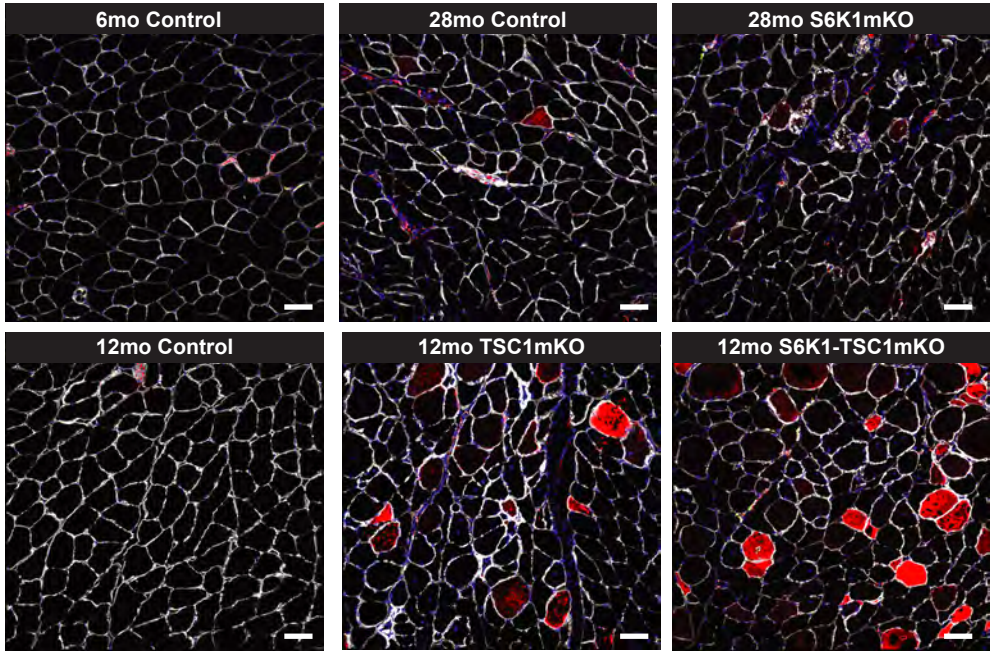

Figure S4

**Supplementary Fig. 5: Molecular and histological analysis of NMJ with activation of 4EBP1 in the skeletal muscle.**

**a-b.** Quantification of (a) endplate area and (b) AChR area of 6-month-old male control (n=5) and 4EBP1mt-muscle (n=3).

**c-d.** Percentage distribution of (c) number of fragments from further analysis of Fig. 4d, and (d) number of post-synaptic myonuclei from further analysis of Fig. 4e of 6-month-old and 28-month-old male control and 4EBP1mt-muscle, as well as 12-month-old male control (abbreviated as **C**), TSC1mKO (abbreviated as **T**) and 4EBP1mt-TSC1mKO (abbreviated as **ET**). Sample size: 6mo and 28mo Control, n=10 per group; 6mo 4EBP1mt-muscle, n=4; 28mo 4EBP1mt-muscle, n=5; 12mo Control and 4EBP1mt-TSC1mKO, n=4 per group; 12mo TSC1mKO, n=3 per group; on average, 25 NMJs were analyzed per animal.

**e-g.** qPCR of select AChR subunit genes and denervation-related genes in whole muscle lysate from (e) 6-month-old male control (n=4) and 4EBP1mt-muscle (n=3); (f) 12-month-old female control (n=4-5), TSC1mKO (n=5-6), S6K1-TSC1mKO (n=6-7), and 4EBP1mt-TSC1mKO (n=4); (g) 12-month-old male control (n=5-7), TSC1mKO (n=5), S6K1-TSC1mKO (n=4), and 4EBP1mt-TSC1mKO (n=4).

**h.** Immunoblotting in gastrocnemius muscle of 12-month-old female control, TSC1mKO, 4EBP1mt-TSC1mKO, and S6K1-TSC1mKO (n=3 per group). Ponceau red staining accompanying the immunoblots showing equal protein loading. Each lane represents individual mouse sample.

Statistical significance: Two-tailed unpaired student t-test for Supplementary Fig. 5a, 5b, and 5e. One-way ANOVA followed by Tukey post-hoc pairwise comparison for Supplementary Fig. 5f and 5g. Only  $P < 0.05$  will be indicated in the graph.



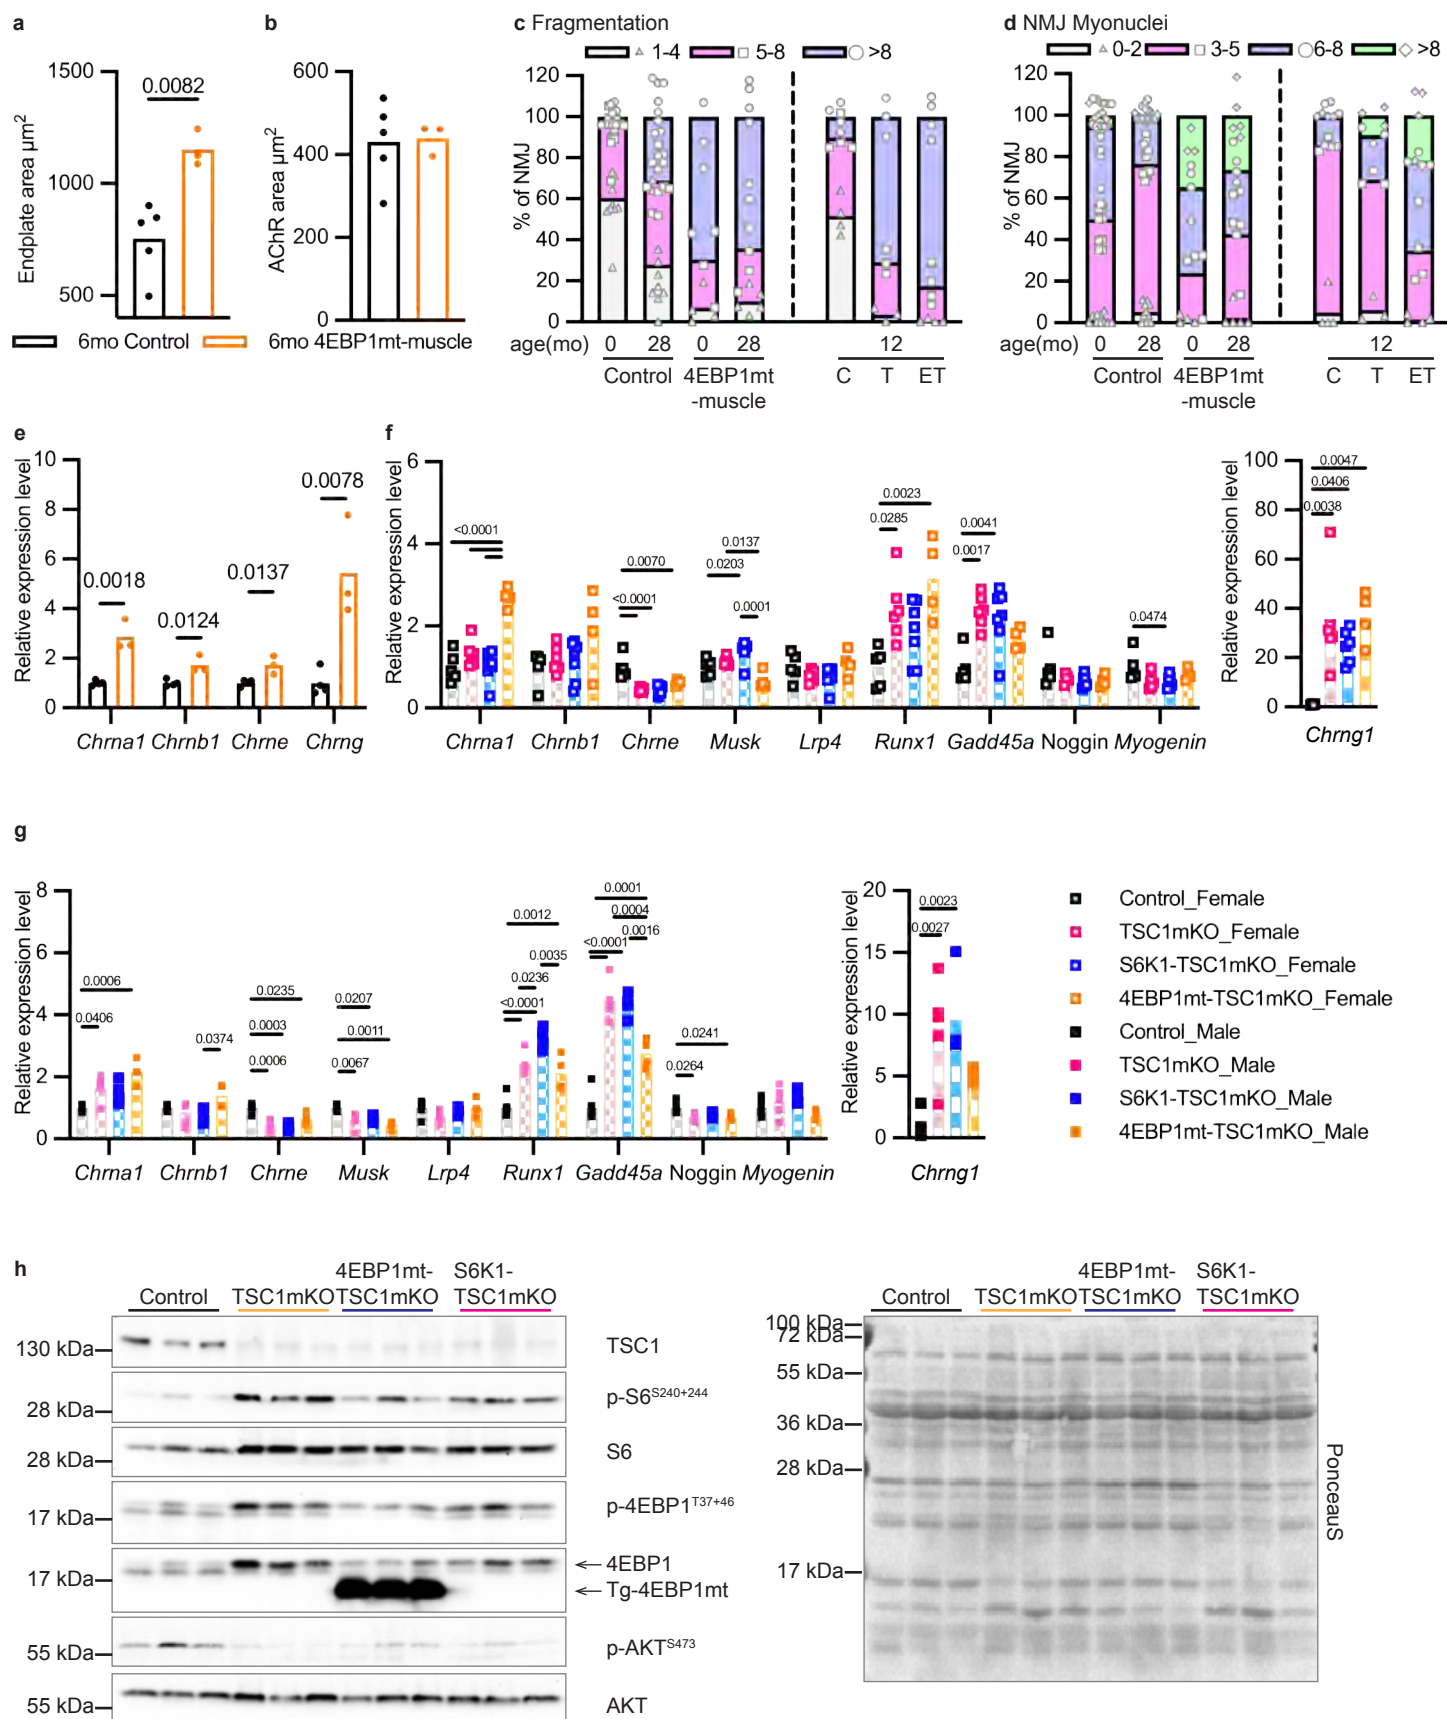

Figure S5

**Supplementary Fig. 6: Pathology analysis of TSC1mKO mouse myofiber.**

**a-b.** Representative H&E staining of **(a)** tibialis anterior and **(b)** soleus muscle from 12-month-old male mice (n=4 per group). Black arrows, myofibers with inclusions; white arrows, degenerated basophilic fibers. Scale bar, 50  $\mu$ m.

**c.** Measurement of muscle coordination and strength by four limbs hanging test in 4-month-old male and female mice. Sample size: Control Male, n=24; TSC1mKO Male, n=12; TSC1-S6K1mKO Male, n=17; 4EBP1mt-TSC1mKO Male, n=9; Control Female, n=31; TSC1mKO Female, n=16; TSC1-S6K1mKO Female, n=27; 4EBP1mt-TSC1mKO Female, n=6. Statistical significance was determined by one-way ANOVA with Tukey's multiple comparison test of the same sex group. Only  $P < 0.05$  will be indicated in the graph.

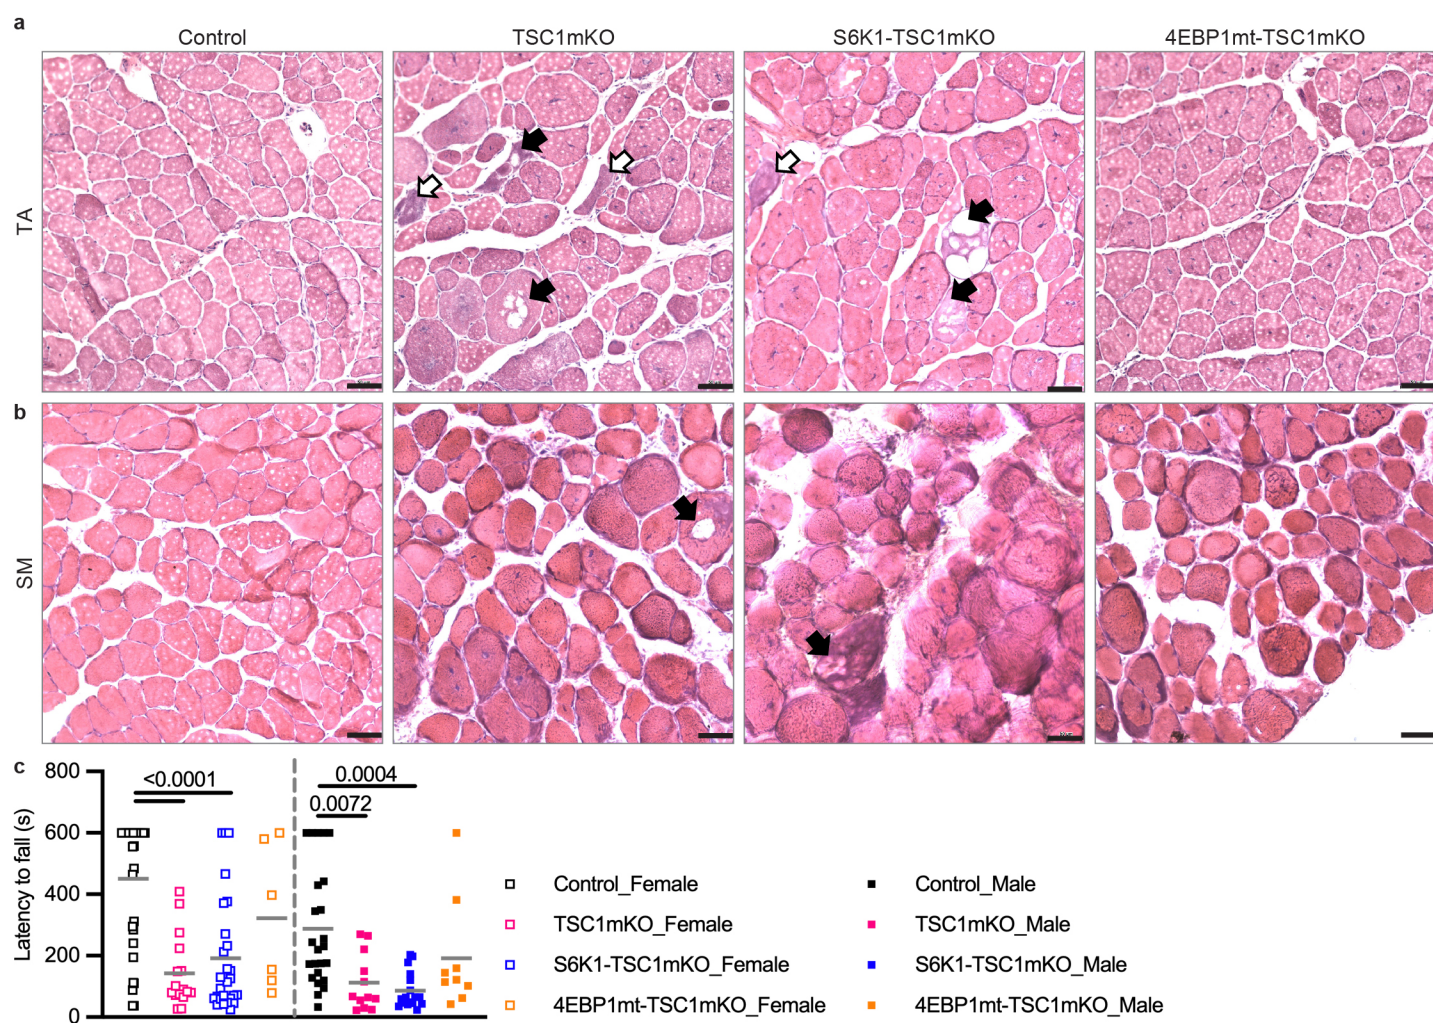

Figure S6

**Supplementary Fig. 7: Activation of 4EBP1 in the skeletal muscle enhances NMJ synaptic transmission and myofiber regeneration.**

**a.** Representative confocal images of NMJs from longitudinal sections of the quadriceps muscle from 3-month-old male mice (Control, n=4; 4EBPmt-muscle, n=3). BTX (green) and neurofilament (NF; red) + synaptophysin (Syn; red); Scale bar = 20  $\mu$  m.

**b.** Representative traces of miniature endplate potential (mEPP, top) and EPP (bottom) recorded from the diaphragm of 3-month-old male mice (n=6 per group).

**c.** Normalized EPP (to first pulse) recorded in the diaphragm in response to repeated phrenic nerve stimulation at 10Hz (n=6 per group).

**d-e.** Percentages of central nucleated fibers sampled from the gastrocnemius muscle of **(d)** 28-month-old control (n=6) and 4EBP1mt-muscle (n=3) male mice, as well as **(e)** 12-month-old control, TSC1mKO, 4EBP1mt-TSC1mKO male mice (n=3 per group). Data are presented as mean values  $\pm$  SEM. Statistical significance was determined by two-tailed unpaired student t-test for [Supplementary Fig. 7d](#) and one-way ANOVA followed by Tukey post-hoc pairwise comparison for [Supplementary Fig. 7e](#). Only P<0.05 will be indicated in the graph.

a BTX / NF + Syn

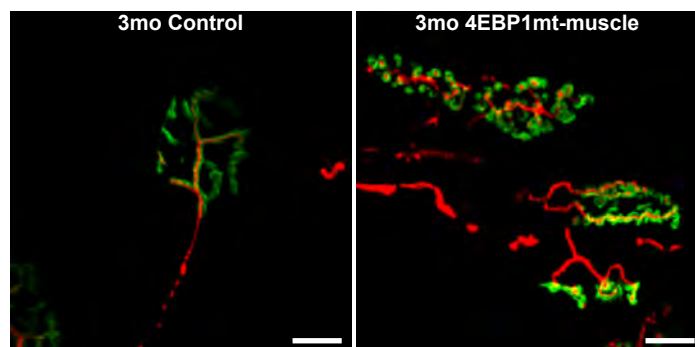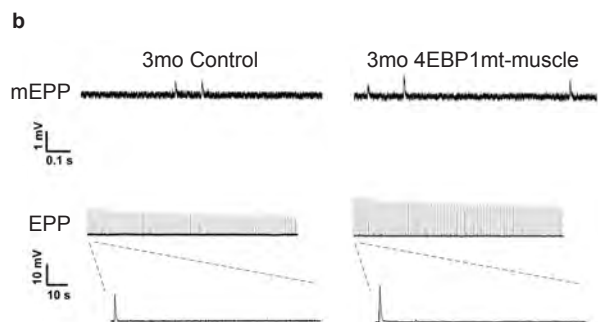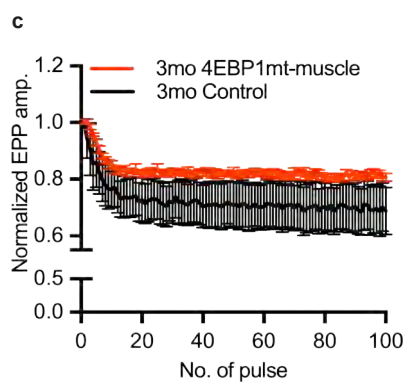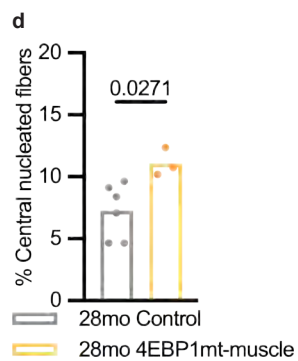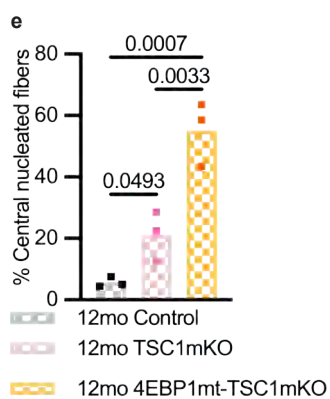

Figure S7

**Supplementary Table 1**Statistical analysis of CSA quantification between groups ([Supplementary Fig. 3C](#)).

| <b>two-way<br/>ANOVA<br/>pS6+</b>      | <b>6mo<br/>Contro<br/>l</b> | <b>28mo<br/>Contro<br/>l</b> | <b>6mo<br/>S6K1mK<br/>O</b> | <b>28mo<br/>S6K1mK<br/>O</b> | <b>12mo<br/>Contro<br/>l</b> | <b>12mo<br/>TSC1mK<br/>O</b> | <b>12mo<br/>S6K1-<br/>TSC1mK<br/>O</b> |
|----------------------------------------|-----------------------------|------------------------------|-----------------------------|------------------------------|------------------------------|------------------------------|----------------------------------------|
| <b>6mo<br/>Control</b>                 |                             |                              |                             |                              |                              | <0.0001                      | <0.0001                                |
| <b>28mo<br/>Control</b>                |                             |                              |                             |                              |                              | 0.004                        | <0.0001                                |
| <b>6mo<br/>S6K1mK<br/>O</b>            |                             |                              |                             |                              |                              | <0.0001                      | <0.0001                                |
| <b>28mo<br/>S6K1mK<br/>O</b>           |                             |                              |                             |                              |                              | 0.014                        | 0.003                                  |
| <b>12mo<br/>Control</b>                |                             |                              |                             |                              |                              | <0.0001                      | <0.0001                                |
| <b>12mo<br/>TSC1mK<br/>O</b>           | <0.0001                     | 0.004                        | <0.0001                     | 0.014                        | <0.0001                      |                              |                                        |
| <b>12mo<br/>S6K1-<br/>TSC1mK<br/>O</b> | <0.0001                     | <0.0001                      | <0.0001                     | 0.003                        | <0.0001                      |                              |                                        |
| <b>two-way<br/>ANOVA<br/>pS6-</b>      | <b>6mo<br/>Contro<br/>l</b> | <b>28mo<br/>Contro<br/>l</b> | <b>6mo<br/>S6K1mK<br/>O</b> | <b>28mo<br/>S6K1mK<br/>O</b> | <b>12mo<br/>Contro<br/>l</b> | <b>12mo<br/>TSC1mK<br/>O</b> | <b>12mo<br/>S6K1-<br/>TSC1mK<br/>O</b> |
| <b>6mo<br/>Control</b>                 |                             | <0.0001                      |                             | 0.0046                       |                              |                              | 0.0148                                 |
| <b>28mo<br/>Control</b>                | <0.0001                     |                              | 0.0005                      |                              | 0.0012                       |                              |                                        |
| <b>6mo<br/>S6K1mK<br/>O</b>            |                             |                              |                             | 0.0005                       |                              |                              |                                        |
| <b>28mo<br/>S6K1mK<br/>O</b>           | 0.0046                      |                              |                             |                              |                              |                              |                                        |
| <b>12mo<br/>Control</b>                |                             | 0.0012                       |                             |                              |                              |                              |                                        |
| <b>12mo<br/>TSC1mK<br/>O</b>           |                             |                              |                             |                              |                              |                              |                                        |
| <b>12mo<br/>S6K1-<br/>TSC1mK<br/>O</b> | 0.0148                      |                              |                             |                              |                              |                              |                                        |

**Supplementary Table 2. List of PCR primers used in this study**

|                 | Forward                | Reverse                |
|-----------------|------------------------|------------------------|
| <i>Chrna1</i>   | TGGACCTATGACGGCTCTGT   | GGAGTAGAACACCCAGTGCT   |
| <i>Chrnbl</i>   | ACGTTGCCCTGGACATCAAT   | CAACCGAGAGGTTTGGGTCA   |
| <i>Chrne</i>    | CGCTATGAGGGAGGTTCCAC   | GACAGTCTGGGCTAGCAGGA   |
| <i>Chrng</i>    | AGGCAGCGCAATGGATTAGT   | TTACAGGCATCCACACAGGC   |
| <i>Musk</i>     | ACTGCGTGGAATGAGCTGAA   | TCCATTGCCTGCCATTCCTT   |
| <i>Lrp4</i>     | GTGTGTGACGGGGACAATG    | GCATTGCTCGTCACTGTTGT   |
| <i>NCAM</i>     | TGACGACTCCTCTACCCTCAC  | AATCACAGCATCCTCCCCTTC  |
| <i>Runx1</i>    | GCCATGAAGAACCAGGTAGC   | GCCGTCCACTGTGATTTTG    |
| <i>Gadd45a</i>  | GAAAGTCGCTACATGGATCAGT | AAACTTCAGTGCAATTTGGTTC |
| <i>Noggin</i>   | TCTTGGCTACAGAGACCTGG   | GAAGCCGGGTAAC TTTTGACG |
| <i>Myogenin</i> | CTACAGGCCTTGCTCAGCTC   | TGGGACCGAACTCCAGTG     |

**Supplementary Table 3. List of RNAScope probes**

| Gene            | Species | Channel | Catalogue no. |
|-----------------|---------|---------|---------------|
| <i>Chrne</i>    | Mouse   | C3      | 832701        |
| <i>Eif4ebp1</i> | Mouse   | C1      | 439321        |



**Supplementary Table 4**

Statistical analysis of the number of AChR fragmentation (Fig. 4d).

| <b>two-way ANOVA female</b> | <b>6mo Control</b> | <b>28mo Control</b> | <b>6mo 4EBP1mt-muscle</b> | <b>28mo 4EBP1mt-muscle</b> | <b>12mo Control</b> | <b>12mo TSC1mKO</b> | <b>12mo 4EBP1mt-TSC1mKO</b> |
|-----------------------------|--------------------|---------------------|---------------------------|----------------------------|---------------------|---------------------|-----------------------------|
| <b>6mo Control</b>          |                    | 0.9997              | 0.1093                    | 0.0086 **                  | >0.9999             | <0.0001 ****        | <0.0001 ****                |
| <b>28mo Control</b>         | 0.9997             |                     | 0.2227                    | 0.0230 *                   | >0.9999             | 0.0001 ***          | <0.0001 ****                |
| <b>6mo 4EBP1mt-muscle</b>   | 0.1093             | 0.2227              |                           | 0.9783                     | 0.4399              | 0.2814              | <0.0001 ****                |
| <b>28mo 4EBP1mt-muscle</b>  | 0.0086 **          | 0.0230 *            | 0.9783                    |                            | 0.1009              | 0.7947              | <0.0001 ****                |
| <b>12mo Control</b>         | >0.9999            | >0.9999             | 0.4399                    | 0.1009                     |                     | 0.0026 **           | <0.0001 ****                |
| <b>12mo TSC1mKO</b>         | <0.0001 ****       | 0.0001 ***          | 0.2814                    | 0.7947                     | 0.0026 **           |                     | <0.0001 ****                |
| <b>12mo 4EBP1mt-TSC1mKO</b> | <0.0001 ****       | <0.0001 ****        | <0.0001 ****              | <0.0001 ****               | <0.0001 ****        | <0.0001 ****        |                             |
| <b>two-way ANOVA Male</b>   | <b>6mo Control</b> | <b>28mo Control</b> | <b>6mo 4EBP1mt-muscle</b> | <b>28mo 4EBP1mt-muscle</b> | <b>12mo Control</b> | <b>12mo TSC1mKO</b> | <b>12mo 4EBP1mt-TSC1mKO</b> |
| <b>6mo Control</b>          |                    | 0.6134              | 0.0100 *                  | <0.0001 ****               | >0.9999             | 0.0001 ***          | <0.0001 ****                |
| <b>28mo Control</b>         | 0.6134             |                     | 0.2413                    | 0.0099 **                  | 0.9518              | 0.0069 **           | <0.0001 ****                |
| <b>6mo 4EBP1mt-muscle</b>   | 0.0100 *           | 0.2413              |                           | 0.9704                     | 0.0932              | 0.7867              | 0.0005 ***                  |
| <b>28mo 4EBP1mt-muscle</b>  | <0.0001 ****       | 0.0099 **           | 0.9704                    |                            | 0.0052 **           | 0.9943              | 0.0047 **                   |
| <b>12mo Control</b>         | >0.9999            | 0.9518              | 0.0932                    | 0.0052 **                  |                     | 0.0031 **           | <0.0001                     |
| <b>12mo TSC1mKO</b>         | 0.0001 ***         | 0.0069 **           | 0.7867                    | 0.9943                     | 0.0031 **           |                     | 0.0967                      |
| <b>12mo 4EBP1mt-TSC1mKO</b> | <0.0001 ****       | <0.0001 ****        | 0.0005 ***                | 0.0047 **                  | <0.0001             | 0.0967              |                             |



**Supplementary Table 5**

Statistical analysis of the number of post-synaptic myonuclei (Fig. 4e).

| <b>two-way ANOVA female</b> | <b>6mo Control</b> | <b>28mo Control</b> | <b>6mo 4EBP1mt-muscle</b> | <b>28mo 4EBP1mt-muscle</b> | <b>12mo Control</b> | <b>12mo TSC1mKO</b> | <b>12mo 4EBP1mt-TSC1mKO</b> |
|-----------------------------|--------------------|---------------------|---------------------------|----------------------------|---------------------|---------------------|-----------------------------|
| <b>6mo Control</b>          |                    | 0.5211              | 0.0175 *                  | 0.0199 *                   | 0.9933              | >0.9999             | 0.0018 **                   |
| <b>28mo Control</b>         | 0.5211             |                     | 0.0001 ***                | 0.0001 ***                 | 0.9883              | 0.5556              | <0.0001 ****                |
| <b>6mo 4EBP1mt-muscle</b>   | 0.0175 *           | 0.0001 ***          |                           | >0.9999                    | 0.0177 *            | 0.0812              | 0.9608                      |
| <b>28mo 4EBP1mt-muscle</b>  | 0.0199 *           | 0.0001 ***          | >0.9999                   |                            | 0.0197 *            | 0.0893              | 0.9530                      |
| <b>12mo Control</b>         | 0.9933             | 0.9883              | 0.0177 *                  | 0.0197 *                   |                     | 0.9847              | 0.0023 **                   |
| <b>12mo TSC1mKO</b>         | >0.9999            | 0.5556              | 0.0812                    | 0.0893                     | 0.9847              |                     | 0.0110 *                    |
| <b>12mo 4EBP1mt-TSC1mKO</b> | 0.0018 **          | <0.0001 ****        | 0.9608                    | 0.9530                     | 0.0023 **           | 0.0110 *            |                             |
| <b>two-way ANOVA Male</b>   | <b>6mo Control</b> | <b>28mo Control</b> | <b>6mo 4EBP1mt-muscle</b> | <b>28mo 4EBP1mt-muscle</b> | <b>12mo Control</b> | <b>12mo TSC1mKO</b> | <b>12mo 4EBP1mt-TSC1mKO</b> |
| <b>6mo Control</b>          |                    | 0.5062              | <0.0001 ****              | 0.0019 **                  | 0.6007              | 0.9956              | 0.1568                      |
| <b>28mo Control</b>         | 0.5062             |                     | <0.0001 ****              | <0.0001 ****               | >0.9999             | 0.9949              | 0.0035 **                   |
| <b>6mo 4EBP1mt-muscle</b>   | <0.0001 ****       | <0.0001 ****        |                           | 0.9041                     | <0.0001 ****        | 0.0005 ***          | 0.3173                      |
| <b>28mo 4EBP1mt-muscle</b>  | 0.0019 **          | <0.0001 ****        | 0.9041                    |                            | 0.0001 ***          | 0.0085 **           | 0.9122                      |
| <b>12mo Control</b>         | 0.6007             | >0.9999             | <0.0001 ****              | 0.0001 ***                 |                     | 0.9843              | 0.0115 *                    |
| <b>12mo TSC1mKO</b>         | 0.9956             | 0.9949              | 0.0005 ***                | 0.0085 **                  | 0.9843              |                     | 0.1692                      |
| <b>12mo 4EBP1mt-TSC1mKO</b> | 0.1568             | 0.0035 **           | 0.3173                    | 0.9122                     | 0.0115 *            | 0.1692              |                             |

**Supplementary Table 6**

Statistical analysis of Mander's colocalization coefficient (Fig. 4f).

| <b>two-way ANOVA female</b> | <b>6mo Control</b> | <b>28mo Control</b> | <b>6mo 4EBP1mt-muscle</b> | <b>28mo 4EBP1mt-muscle</b> | <b>12mo Control</b> | <b>12mo TSC1mKO</b> | <b>12mo 4EBP1mt-TSC1mKO</b> |
|-----------------------------|--------------------|---------------------|---------------------------|----------------------------|---------------------|---------------------|-----------------------------|
| <b>6mo Control</b>          |                    | >0.9999             | 0.9997                    | 0.8082                     | 0.9875              | 0.8087              | 0.0319 *                    |
| <b>28mo Control</b>         | >0.9999            |                     | 0.9995                    | 0.7869                     | 0.9890              | 0.7865              | 0.0288 *                    |
| <b>6mo 4EBP1mt-muscle</b>   | 0.9997             | 0.9995              |                           | 0.9691                     | 0.9401              | 0.9690              | 0.1257                      |
| <b>28mo 4EBP1mt-muscle</b>  | 0.8082             | 0.7869              | 0.9691                    |                            | 0.4934              | >0.9999             | 0.5382                      |
| <b>12mo Control</b>         | 0.9875             | 0.9890              | 0.9401                    | 0.4934                     |                     | 0.4929              | 0.0162 **                   |
| <b>12mo TSC1mKO</b>         | 0.8087             | 0.7865              | 0.9690                    | >0.9999                    | 0.4929              |                     | 0.5386                      |
| <b>12mo 4EBP1mt-TSC1mKO</b> | 0.0319 *           | 0.0288 *            | 0.1257                    | 0.5382                     | 0.0162 **           | 0.5386              |                             |
| <b>two-way ANOVA Male</b>   | <b>6mo Control</b> | <b>28mo Control</b> | <b>6mo 4EBP1mt-muscle</b> | <b>28mo 4EBP1mt-muscle</b> | <b>12mo Control</b> | <b>12mo TSC1mKO</b> | <b>12mo 4EBP1mt-TSC1mKO</b> |
| <b>6mo Control</b>          |                    | 0.0754              | 0.0031 **                 | 0.0081 **                  | 0.7258              | 0.8797              | 0.0760                      |
| <b>28mo Control</b>         | 0.0754             |                     | 0.5285                    | 0.8247                     | 0.9944              | 0.9897              | 0.9919                      |
| <b>6mo 4EBP1mt-muscle</b>   | 0.0031 **          | 0.5285              |                           | 0.9985                     | 0.3744              | 0.3915              | 0.9622                      |
| <b>28mo 4EBP1mt-muscle</b>  | 0.0081 **          | 0.8247              | 0.9985                    |                            | 0.6310              | 0.6347              | 0.9990                      |
| <b>12mo Control</b>         | 0.7258             | 0.9944              | 0.3744                    | 0.6310                     |                     | >0.9999             | 0.9140                      |
| <b>12mo TSC1mKO</b>         | 0.8797             | 0.9897              | 0.3915                    | 0.6347                     | >0.9999             |                     | 0.8996                      |
| <b>12mo 4EBP1mt-TSC1mKO</b> | 0.0760             | 0.9919              | 0.9622                    | 0.9990                     | 0.9140              | 0.8996              |                             |

**Supplementary Table 7**Statistical analysis of quantification of the percentages of NCAM-positive myofibers ([Fig. 4g](#)).

| one-way ANOVA        | 3mo Control   | 28mo Control  | 3mo 4EBP1mt-muscle | 28mo 4EBP1mt-muscle | 12mo Control | 12mo TSC1mKO  | 12mo 4EBP1mt-TSC1mKO |
|----------------------|---------------|---------------|--------------------|---------------------|--------------|---------------|----------------------|
| 3mo Control          |               | <0.0001 ##### | 0.0509             | 0.0004 ###          | 0.9807       | <0.0001 ##### | 0.0160 #             |
| 28mo Control         | <0.0001 ##### |               | 0.0572             | >0.9999             | 0.0006 ###   | 0.7120        | 0.4065               |
| 3mo 4EBP1mt-muscle   | 0.0509        | 0.0572        |                    | 0.1877              | 0.3303       | 0.0081 ##     | 0.9820               |
| 28mo 4EBP1mt-muscle  | 0.0004 ###    | >0.9999       | 0.1877             |                     | 0.0039 ##    | 0.7549        | 0.6470               |
| 12mo Control         | 0.9807        | 0.0006 ###    | 0.3303             | 0.0039 ##           |              | 0.0002 ###    | 0.1209               |
| 12mo TSC1mKO         | <0.0001 ##### | 0.7120        | 0.0081 ##          | 0.7549              | 0.0002 ###   |               | 0.0669               |
| 12mo 4EBP1mt-TSC1mKO | 0.0160 #      | 0.4065        | 0.9820             | 0.6470              | 0.1209       | 0.0669        |                      |
